# Supplementary material for: Predicting hair cortisol levels with hair pigmentation genes: a possible hair pigmentation bias
Source: PubMed Central journal article supplement (PMC5561185; doi:10.1038/s41598-017-07034-w), 2017-08-17

Predicting hair cortisol levels with hair pigmentation genes:  
a possible hair pigmentation bias

Alexander Neumann; Gerard Noppe; Fan Liu; Manfred Kayser; Frank C. Verhulst; Vincent  
W.V. Jaddoe, Elisabeth F.C. van Rossum; Henning Tiemeier

**SUPPLEMENTARY TABLES AND FIGURES**

## Pigmentations SNPs and Hair Color

Table S1: HlrisPlex SNPs available in Generation R.

| SNP         | Gene    | Effect Allele | Other Allele | Effect Allele Frequency | Minor Allele Frequency | Genotyped | R <sup>2</sup> |
|-------------|---------|---------------|--------------|-------------------------|------------------------|-----------|----------------|
| rs1042602   | TYR     | C             | A            | 0.668                   | 0.332                  | Yes       | 1.000          |
| rs1110400*  | MC1R    | T             | C            | 0.995                   | 0.005                  | No        | 0.896          |
| rs11547464* | MC1R    | G             | A            | 0.995                   | 0.005                  | No        | 0.195          |
| rs12203592  | IRF4    | C             | T            | 0.935                   | 0.065                  | Yes       | 1.000          |
| rs12821256  | KITLG   | T             | C            | 0.916                   | 0.084                  | Yes       | 0.978          |
| rs12896399  | SLC24A4 | G             | T            | 0.614                   | 0.386                  | Yes       | 1.000          |
| rs12913832* | HERC2   | A             | G            | 0.570                   | 0.430                  | No        | 0.208          |
| rs1393350   | TYR     | G             | A            | 0.824                   | 0.176                  | Yes       | 1.000          |
| rs16891982  | SLC45A2 | C             | G            | 0.262                   | 0.262                  | No        | 0.725          |
| rs1800407   | OCA2    | C             | T            | 0.954                   | 0.046                  | No        | 0.471          |
| rs1805005   | MC1R    | G             | T            | 0.897                   | 0.103                  | No        | 0.460          |
| rs1805006*  | MC1R    | C             | A            | 0.992                   | 0.008                  | No        | 0.193          |
| rs1805007   | MC1R    | C             | T            | 0.953                   | 0.047                  | No        | 0.763          |
| rs1805008   | MC1R    | C             | T            | 0.929                   | 0.071                  | No        | 0.789          |
| rs1805009*  | MC1R    | G             | C            | 0.992                   | 0.008                  | No        | 0.340          |
| rs2228479   | MC1R    | G             | A            | 0.922                   | 0.078                  | No        | 0.910          |
| rs2378249   | ASIP    | A             | G            | 0.838                   | 0.162                  | Yes       | 1.000          |
| rs2402130   | SLC24A4 | A             | G            | 0.769                   | 0.231                  | Yes       | 1.000          |
| rs28777     | SLC45A2 | A             | C            | 0.774                   | 0.226                  | No        | 0.696          |
| rs4959270   | EXOC2   | C             | A            | 0.582                   | 0.418                  | Yes       | 1.000          |
| rs683       | TYRP1   | C             | A            | 0.474                   | 0.474                  | No        | 0.988          |
| rs885479    | MC1R    | G             | A            | 0.941                   | 0.059                  | Yes       | 0.999          |

R<sup>2</sup> refers to imputation quality.

\* indicates SNPs excluded from analysis due to poor imputation quality and/or low minor allele frequency.

**Table S2: Hair Color regressed on pigmentation SNPs in multi-ancestry training sample (n=1565).**

| Predictor   | Coefficient | SE   | p     |
|-------------|-------------|------|-------|
| (Intercept) | 3.18        | 0.50 | 3E-10 |
| rs885479    | 0.16        | 0.07 | 3E-02 |
| rs1805008   | 0.31        | 0.07 | 4E-06 |
| rs1805005   | 0.15        | 0.08 | 6E-02 |
| rs1805007   | 0.61        | 0.08 | 4E-13 |
| rs2228479   | 0.02        | 0.06 | 8E-01 |
| rs28777     | -0.35       | 0.07 | 2E-07 |
| rs2402130   | -0.05       | 0.04 | 3E-01 |
| rs12896399  | 0.09        | 0.04 | 2E-02 |
| rs1042602   | 0.09        | 0.04 | 2E-02 |
| rs1393350   | 0.10        | 0.04 | 3E-02 |
| rs12821256  | 0.20        | 0.05 | 2E-04 |
| rs4959270   | 0.02        | 0.03 | 5E-01 |
| rs12203592  | -0.46       | 0.06 | 7E-14 |
| rs1800407   | -0.14       | 0.11 | 2E-01 |
| rs2378249   | 0.05        | 0.04 | 2E-01 |
| rs683       | 0.03        | 0.03 | 3E-01 |
| PCA1        | -15.68      | 0.88 | 2E-64 |
| PCA2        | -17.90      | 1.28 | 7E-42 |
| PCA3        | 23.81       | 1.94 | 5E-33 |
| PCA4        | 11.43       | 2.34 | 1E-06 |
| PCA5        | -2.45       | 3.05 | 4E-01 |
| PCA6        | 0.63        | 3.62 | 9E-01 |
| PCA7        | 18.45       | 3.83 | 2E-06 |
| PCA8        | -16.77      | 4.39 | 1E-04 |
| PCA9        | 6.22        | 6.23 | 3E-01 |
| PCA10       | 1.41        | 5.43 | 8E-01 |
| PCA11       | -2.61       | 5.27 | 6E-01 |
| PCA12       | 4.90        | 5.51 | 4E-01 |
| PCA13       | 1.49        | 5.02 | 8E-01 |
| PCA14       | 8.07        | 5.00 | 1E-01 |
| PCA15       | -7.40       | 4.61 | 1E-01 |
| PCA16       | 0.46        | 4.72 | 9E-01 |
| PCA17       | -8.72       | 4.67 | 6E-02 |
| PCA18       | 5.98        | 4.63 | 2E-01 |
| PCA19       | 10.43       | 4.72 | 3E-02 |
| PCA20       | -3.76       | 4.56 | 4E-01 |

Regression coefficients indicate increase in 1 level darker hair per number of effect allele.

## Hair Cortisone (all ancestries)

Table S3: Hair cortisone regressed on hair color and polygenic score of hair color in multi-ancestry sample (n=1656).

| Outcome<br>Model             | Hair Cortisone (standardized)             |      |       |                                                |      |       |                                        |      |       |                                             |      |       |
|------------------------------|-------------------------------------------|------|-------|------------------------------------------------|------|-------|----------------------------------------|------|-------|---------------------------------------------|------|-------|
|                              | Hair Color<br>(no ancestry<br>correction) |      |       | Polygenic Score<br>(no ancestry<br>correction) |      |       | Hair Color<br>(ancestry<br>correction) |      |       | Polygenic Score<br>(ancestry<br>correction) |      |       |
| Predictor                    | $\beta$                                   | SE   | p     | $\beta$                                        | SE   | p     | $\beta$                                | SE   | p     | $\beta$                                     | SE   | p     |
| Intercept                    | -0.22                                     | 0.24 | 4E-01 | 0.01                                           | 0.24 | 1E00  | 0.07                                   | 0.28 | 8E-01 | 0.16                                        | 0.25 | 5E-01 |
| Hair Color                   | 0.06                                      | 0.02 | 5E-04 |                                                |      |       | 0.02                                   | 0.03 | 5E-01 |                                             |      |       |
| Polygenic score <sup>1</sup> |                                           |      |       | 0.09                                           | 0.02 | 3E-04 |                                        |      |       | 0.06                                        | 0.03 | 3E-02 |
| Sex, female                  | -0.22                                     | 0.05 | 1E-05 | -0.21                                          | 0.05 | 1E-05 | -0.23                                  | 0.05 | 2E-06 | -0.23                                       | 0.05 | 2E-06 |
| Age, months                  | 0.00                                      | 0.00 | 8E-01 | 0.00                                           | 0.00 | 6E-01 | 0.00                                   | 0.00 | 8E-01 | 0.00                                        | 0.00 | 9E-01 |
| CS use                       | -0.09                                     | 0.09 | 3E-01 | -0.09                                          | 0.09 | 3E-01 | -0.08                                  | 0.09 | 4E-01 | -0.08                                       | 0.09 | 4E-01 |
| PCA1                         |                                           |      |       |                                                |      |       | 0.05                                   | 0.04 | 2E-01 | 0.07                                        | 0.04 | 7E-02 |
| PCA2                         |                                           |      |       |                                                |      |       | -0.07                                  | 0.03 | 1E-02 | -0.07                                       | 0.02 | 7E-03 |
| PCA3                         |                                           |      |       |                                                |      |       | 0.17                                   | 0.03 | 4E-10 | 0.17                                        | 0.03 | 4E-11 |
| PCA4                         |                                           |      |       |                                                |      |       | -0.03                                  | 0.02 | 2E-01 | -0.03                                       | 0.02 | 2E-01 |
| PCA5                         |                                           |      |       |                                                |      |       | -0.06                                  | 0.02 | 1E-02 | -0.06                                       | 0.02 | 9E-03 |
| PCA6                         |                                           |      |       |                                                |      |       | -0.06                                  | 0.03 | 3E-02 | -0.06                                       | 0.03 | 3E-02 |
| PCA7                         |                                           |      |       |                                                |      |       | -0.02                                  | 0.03 | 4E-01 | -0.02                                       | 0.03 | 4E-01 |
| PCA8                         |                                           |      |       |                                                |      |       | -0.03                                  | 0.03 | 2E-01 | -0.03                                       | 0.03 | 2E-01 |
| PCA9                         |                                           |      |       |                                                |      |       | -0.03                                  | 0.02 | 2E-01 | -0.03                                       | 0.02 | 2E-01 |
| PCA10                        |                                           |      |       |                                                |      |       | 0.01                                   | 0.03 | 8E-01 | 0.01                                        | 0.03 | 7E-01 |
| PCA11                        |                                           |      |       |                                                |      |       | -0.01                                  | 0.02 | 6E-01 | -0.01                                       | 0.02 | 5E-01 |
| PCA12                        |                                           |      |       |                                                |      |       | -0.01                                  | 0.02 | 7E-01 | -0.01                                       | 0.02 | 7E-01 |
| PCA13                        |                                           |      |       |                                                |      |       | 0.00                                   | 0.02 | 1E+00 | 0.00                                        | 0.02 | 1E+00 |
| PCA14                        |                                           |      |       |                                                |      |       | -0.06                                  | 0.03 | 2E-02 | -0.06                                       | 0.03 | 2E-02 |
| PCA15                        |                                           |      |       |                                                |      |       | 0.02                                   | 0.02 | 4E-01 | 0.02                                        | 0.02 | 4E-01 |
| PCA16                        |                                           |      |       |                                                |      |       | -0.03                                  | 0.02 | 2E-01 | -0.03                                       | 0.02 | 2E-01 |
| PCA17                        |                                           |      |       |                                                |      |       | -0.01                                  | 0.02 | 6E-01 | -0.01                                       | 0.02 | 6E-01 |
| PCA18                        |                                           |      |       |                                                |      |       | 0.00                                   | 0.02 | 1E+00 | 0.00                                        | 0.02 | 1E+00 |
| PCA19                        |                                           |      |       |                                                |      |       | -0.02                                  | 0.02 | 3E-01 | -0.02                                       | 0.02 | 3E-01 |
| PCA20                        |                                           |      |       |                                                |      |       | 0.02                                   | 0.02 | 5E-01 | 0.01                                        | 0.02 | 5E-01 |

Positive coefficients indicate increases in hormone concentrations. Higher hair color and polygenic scores indicate darker hair. All models were adjusted for sex, age (in months) and corticosteroid (CS) use. Results are shown for models without and with ancestry correction (PCA).

<sup>1</sup>Polygenic score is based on 9 SNPs from a training model adjusted for genetic ancestry

Table S4: Hair cortisone regressed on individual pigmentation SNPs in multi-ancestry sample (n=1656).

| Predictor  | Seperate models<br>(no ancestry<br>correction) |      |       | Mutually Adjusted<br>(no ancestry<br>correction) |      |       | Seperate models<br>(ancestry<br>correction) |      |       | Mutually Adjusted<br>(ancestry<br>correction) |      |       |
|------------|------------------------------------------------|------|-------|--------------------------------------------------|------|-------|---------------------------------------------|------|-------|-----------------------------------------------|------|-------|
|            | $\beta$                                        | SE   | p     | $\beta$                                          | SE   | p     | $\beta$                                     | SE   | p     | $\beta$                                       | SE   | p     |
| rs885479   | -0.01                                          | 0.07 | 9E-01 | 0.01                                             | 0.07 | 9E-01 | 0.03                                        | 0.07 | 7E-01 | 0.05                                          | 0.08 | 5E-01 |
| rs1805008  | 0.28                                           | 0.07 | 1E-04 | 0.26                                             | 0.07 | 6E-04 | 0.26                                        | 0.07 | 3E-04 | 0.27                                          | 0.07 | 3E-04 |
| rs1805005  | -0.08                                          | 0.08 | 3E-01 | -0.05                                            | 0.08 | 5E-01 | -0.04                                       | 0.08 | 6E-01 | 0.02                                          | 0.09 | 8E-01 |
| rs1805007  | 0.10                                           | 0.09 | 3E-01 | 0.07                                             | 0.09 | 4E-01 | 0.01                                        | 0.09 | 9E-01 | 0.05                                          | 0.09 | 6E-01 |
| rs2228479  | -0.03                                          | 0.07 | 7E-01 | -0.03                                            | 0.07 | 7E-01 | -0.05                                       | 0.07 | 5E-01 | -0.02                                         | 0.07 | 8E-01 |
| rs28777    | -0.13                                          | 0.05 | 8E-03 | 0.06                                             | 0.16 | 7E-01 | -0.04                                       | 0.06 | 5E-01 | 0.08                                          | 0.16 | 6E-01 |
| rs16891982 | 0.13                                           | 0.04 | 4E-03 | 0.11                                             | 0.15 | 4E-01 | 0.06                                        | 0.06 | 3E-01 | 0.14                                          | 0.16 | 4E-01 |
| rs2402130  | -0.05                                          | 0.04 | 2E-01 | -0.01                                            | 0.05 | 9E-01 | -0.06                                       | 0.04 | 2E-01 | -0.05                                         | 0.05 | 3E-01 |
| rs12896399 | 0.08                                           | 0.03 | 2E-02 | 0.05                                             | 0.04 | 2E-01 | 0.05                                        | 0.04 | 2E-01 | 0.03                                          | 0.04 | 4E-01 |
| rs1042602  | -0.06                                          | 0.04 | 1E-01 | -0.06                                            | 0.04 | 1E-01 | -0.03                                       | 0.04 | 4E-01 | -0.01                                         | 0.04 | 7E-01 |
| rs1393350  | 0.10                                           | 0.04 | 2E-02 | 0.06                                             | 0.05 | 2E-01 | 0.09                                        | 0.04 | 5E-02 | 0.08                                          | 0.05 | 8E-02 |
| rs12821256 | 0.10                                           | 0.06 | 9E-02 | 0.05                                             | 0.06 | 4E-01 | 0.02                                        | 0.06 | 8E-01 | 0.01                                          | 0.06 | 9E-01 |
| rs4959270  | -0.02                                          | 0.04 | 5E-01 | -0.04                                            | 0.04 | 3E-01 | -0.03                                       | 0.03 | 4E-01 | -0.03                                         | 0.04 | 4E-01 |
| rs12203592 | 0.03                                           | 0.07 | 7E-01 | 0.02                                             | 0.07 | 8E-01 | -0.01                                       | 0.07 | 9E-01 | 0.00                                          | 0.07 | 1E+00 |
| rs1800407  | -0.16                                          | 0.12 | 2E-01 | -0.14                                            | 0.12 | 2E-01 | -0.11                                       | 0.12 | 3E-01 | -0.10                                         | 0.12 | 4E-01 |
| rs2378249  | 0.14                                           | 0.05 | 3E-03 | 0.14                                             | 0.05 | 2E-03 | 0.12                                        | 0.05 | 1E-02 | 0.12                                          | 0.05 | 7E-03 |
| rs683      | 0.06                                           | 0.03 | 6E-02 | 0.03                                             | 0.03 | 3E-01 | 0.02                                        | 0.04 | 6E-01 | 0.03                                          | 0.04 | 5E-01 |

SNPs were either included in separate models or mutually adjusted in a single model. Positive coefficients indicate increases in hormone concentrations per effect allele (see Table S1).

## Cortisol (European Ancestry)

Table S5: Hair cortisol regressed on hair color and polygenic score of hair color in European sample (n=867).

| Outcome<br>Model             | Hair Cortisol (standardized, European ancestry) |      |       |                                                |      |       |                                        |      |       |                                             |      |       |
|------------------------------|-------------------------------------------------|------|-------|------------------------------------------------|------|-------|----------------------------------------|------|-------|---------------------------------------------|------|-------|
|                              | Hair Color<br>(no ancestry<br>correction)       |      |       | Polygenic Score<br>(no ancestry<br>correction) |      |       | Hair Color<br>(ancestry<br>correction) |      |       | Polygenic Score<br>(ancestry<br>correction) |      |       |
| Predictor                    | $\beta$                                         | SE   | p     | $\beta$                                        | SE   | p     | $\beta$                                | SE   | p     | $\beta$                                     | SE   | p     |
| Intercept                    | 0.41                                            | 0.43 | 3E-01 | 0.38                                           | 0.41 | 3E-01 | 0.42                                   | 0.43 | 3E-01 | 0.41                                        | 0.41 | 3E-01 |
| Hair Color                   | -0.01                                           | 0.04 | 8E-01 |                                                |      |       | -0.01                                  | 0.04 | 9E-01 |                                             |      |       |
| Polygenic score <sup>1</sup> |                                                 |      |       | 0.05                                           | 0.03 | 2E-01 |                                        |      |       | 0.05                                        | 0.03 | 1E-01 |
| Sex, female                  | -0.26                                           | 0.07 | 1E-04 | -0.25                                          | 0.07 | 2E-04 | -0.28                                  | 0.07 | 6E-05 | -0.27                                       | 0.07 | 7E-05 |
| Age, months                  | 0.00                                            | 0.01 | 5E-01 | 0.00                                           | 0.01 | 5E-01 | 0.00                                   | 0.01 | 5E-01 | 0.00                                        | 0.01 | 5E-01 |
| CS use                       | 0.35                                            | 0.12 | 3E-03 | 0.35                                           | 0.12 | 3E-03 | 0.35                                   | 0.12 | 3E-03 | 0.36                                        | 0.12 | 2E-03 |
| PCA1                         |                                                 |      |       |                                                |      |       | -0.01                                  | 0.03 | 8E-01 | -0.01                                       | 0.03 | 8E-01 |
| PCA2                         |                                                 |      |       |                                                |      |       | -0.04                                  | 0.05 | 5E-01 | -0.04                                       | 0.05 | 5E-01 |
| PCA3                         |                                                 |      |       |                                                |      |       | 0.00                                   | 0.03 | 1E+00 | 0.00                                        | 0.03 | 9E-01 |
| PCA4                         |                                                 |      |       |                                                |      |       | 0.07                                   | 0.03 | 4E-02 | 0.07                                        | 0.03 | 5E-02 |
| PCA5                         |                                                 |      |       |                                                |      |       | -0.03                                  | 0.03 | 3E-01 | -0.03                                       | 0.03 | 3E-01 |
| PCA6                         |                                                 |      |       |                                                |      |       | 0.03                                   | 0.03 | 4E-01 | 0.03                                        | 0.03 | 3E-01 |
| PCA7                         |                                                 |      |       |                                                |      |       | -0.02                                  | 0.04 | 6E-01 | -0.02                                       | 0.04 | 6E-01 |
| PCA8                         |                                                 |      |       |                                                |      |       | -0.02                                  | 0.04 | 6E-01 | -0.02                                       | 0.04 | 5E-01 |
| PCA9                         |                                                 |      |       |                                                |      |       | 0.02                                   | 0.03 | 5E-01 | 0.02                                        | 0.03 | 5E-01 |
| PCA10                        |                                                 |      |       |                                                |      |       | -0.05                                  | 0.03 | 1E-01 | -0.05                                       | 0.03 | 1E-01 |
| PCA11                        |                                                 |      |       |                                                |      |       | 0.06                                   | 0.04 | 1E-01 | 0.05                                        | 0.04 | 1E-01 |
| PCA12                        |                                                 |      |       |                                                |      |       | 0.04                                   | 0.03 | 2E-01 | 0.04                                        | 0.03 | 2E-01 |
| PCA13                        |                                                 |      |       |                                                |      |       | 0.04                                   | 0.03 | 2E-01 | 0.04                                        | 0.03 | 2E-01 |
| PCA14                        |                                                 |      |       |                                                |      |       | -0.01                                  | 0.03 | 7E-01 | -0.01                                       | 0.03 | 7E-01 |
| PCA15                        |                                                 |      |       |                                                |      |       | 0.05                                   | 0.03 | 2E-01 | 0.05                                        | 0.03 | 2E-01 |
| PCA16                        |                                                 |      |       |                                                |      |       | -0.03                                  | 0.03 | 4E-01 | -0.03                                       | 0.03 | 3E-01 |
| PCA17                        |                                                 |      |       |                                                |      |       | 0.02                                   | 0.03 | 5E-01 | 0.02                                        | 0.03 | 5E-01 |
| PCA18                        |                                                 |      |       |                                                |      |       | 0.02                                   | 0.03 | 6E-01 | 0.02                                        | 0.03 | 5E-01 |
| PCA19                        |                                                 |      |       |                                                |      |       | -0.01                                  | 0.03 | 9E-01 | -0.01                                       | 0.03 | 9E-01 |
| PCA20                        |                                                 |      |       |                                                |      |       | 0.03                                   | 0.03 | 4E-01 | 0.03                                        | 0.03 | 4E-01 |

Positive coefficients indicate increases in hormone concentrations. Higher hair color and polygenic scores indicate darker hair. All models were adjusted for sex, age (in months) and corticosteroid (CS) use. Results are shown for models without and with ancestry correction (PCA).

<sup>1</sup>Polygenic score is based on 9 SNPs from a training model adjusted for genetic ancestry

Table S6: Hair cortisol regressed on individual pigmentation SNPs in European ancestry sample (n=867).

| Predictor  | Seperate models<br>(no ancestry<br>correction) |      |       | Mutually Adjusted<br>(no ancestry<br>correction) |      |       | Seperate models<br>(ancestry<br>correction) |      |       | Mutually Adjusted<br>(ancestry<br>correction) |      |       |
|------------|------------------------------------------------|------|-------|--------------------------------------------------|------|-------|---------------------------------------------|------|-------|-----------------------------------------------|------|-------|
|            | $\beta$                                        | SE   | p     | $\beta$                                          | SE   | p     | $\beta$                                     | SE   | p     | $\beta$                                       | SE   | p     |
| rs885479   | -0.13                                          | 0.11 | 2E-01 | -0.16                                            | 0.11 | 2E-01 | -0.13                                       | 0.11 | 2E-01 | -0.16                                         | 0.11 | 1E-01 |
| rs1805008  | 0.14                                           | 0.09 | 1E-01 | 0.11                                             | 0.09 | 2E-01 | 0.15                                        | 0.09 | 1E-01 | 0.12                                          | 0.10 | 2E-01 |
| rs1805005  | -0.15                                          | 0.11 | 2E-01 | -0.14                                            | 0.12 | 2E-01 | -0.18                                       | 0.11 | 9E-02 | -0.18                                         | 0.12 | 1E-01 |
| rs1805007  | -0.01                                          | 0.10 | 9E-01 | 0.00                                             | 0.11 | 1E+00 | 0.00                                        | 0.10 | 1E+00 | 0.00                                          | 0.11 | 1E+00 |
| rs2228479  | 0.10                                           | 0.09 | 3E-01 | 0.07                                             | 0.09 | 5E-01 | 0.10                                        | 0.09 | 3E-01 | 0.07                                          | 0.09 | 5E-01 |
| rs28777    | -0.12                                          | 0.16 | 5E-01 | 0.01                                             | 0.52 | 1E+00 | -0.13                                       | 0.16 | 4E-01 | 0.01                                          | 0.52 | 1E+00 |
| rs16891982 | 0.10                                           | 0.15 | 5E-01 | 0.11                                             | 0.47 | 8E-01 | 0.12                                        | 0.15 | 4E-01 | 0.11                                          | 0.47 | 8E-01 |
| rs2402130  | 0.00                                           | 0.06 | 9E-01 | -0.03                                            | 0.07 | 7E-01 | 0.00                                        | 0.06 | 1E+00 | -0.04                                         | 0.07 | 5E-01 |
| rs12896399 | -0.03                                          | 0.05 | 5E-01 | -0.04                                            | 0.05 | 4E-01 | -0.04                                       | 0.05 | 4E-01 | -0.06                                         | 0.05 | 3E-01 |
| rs1042602  | -0.05                                          | 0.05 | 4E-01 | -0.03                                            | 0.06 | 6E-01 | -0.06                                       | 0.05 | 2E-01 | -0.04                                         | 0.06 | 5E-01 |
| rs1393350  | 0.06                                           | 0.06 | 3E-01 | 0.06                                             | 0.06 | 3E-01 | 0.08                                        | 0.06 | 1E-01 | 0.08                                          | 0.06 | 2E-01 |
| rs12821256 | -0.07                                          | 0.07 | 3E-01 | -0.06                                            | 0.07 | 4E-01 | -0.06                                       | 0.07 | 4E-01 | -0.06                                         | 0.07 | 4E-01 |
| rs4959270  | -0.01                                          | 0.05 | 8E-01 | 0.01                                             | 0.05 | 8E-01 | -0.01                                       | 0.05 | 8E-01 | 0.01                                          | 0.05 | 8E-01 |
| rs12203592 | -0.21                                          | 0.08 | 1E-02 | -0.21                                            | 0.09 | 2E-02 | -0.21                                       | 0.09 | 2E-02 | -0.20                                         | 0.09 | 2E-02 |
| rs1800407  | 0.08                                           | 0.16 | 6E-01 | 0.06                                             | 0.16 | 7E-01 | 0.10                                        | 0.17 | 6E-01 | 0.08                                          | 0.17 | 6E-01 |
| rs2378249  | 0.13                                           | 0.06 | 4E-02 | 0.14                                             | 0.06 | 2E-02 | 0.13                                        | 0.06 | 4E-02 | 0.14                                          | 0.06 | 3E-02 |
| rs683      | 0.03                                           | 0.05 | 6E-01 | 0.03                                             | 0.05 | 6E-01 | 0.03                                        | 0.05 | 5E-01 | 0.03                                          | 0.05 | 6E-01 |

SNPs were either included in separate models or mutually adjusted in a single model. Positive coefficients indicate increases in hormone concentrations per effect allele (see Table S1).

## Cortisone (European Ancestry)

Table S7: Hair cortisone regressed on hair color and polygenic score of hair color in European sample (n=862).

| Outcome<br>Model             | Hair Cortisone (standardized, European ancestry) |      |       |                                                |      |       |                                        |      |       |                                             |      |       |
|------------------------------|--------------------------------------------------|------|-------|------------------------------------------------|------|-------|----------------------------------------|------|-------|---------------------------------------------|------|-------|
|                              | Hair Color<br>(no ancestry<br>correction)        |      |       | Polygenic Score<br>(no ancestry<br>correction) |      |       | Hair Color<br>(ancestry<br>correction) |      |       | Polygenic Score<br>(ancestry<br>correction) |      |       |
| Predictor                    | $\beta$                                          | SE   | p     | $\beta$                                        | SE   | p     | $\beta$                                | SE   | p     | $\beta$                                     | SE   | p     |
| Intercept                    | -0.04                                            | 0.43 | 9E-01 | 0.09                                           | 0.41 | 8E-01 | -0.02                                  | 0.43 | 1E+00 | 0.12                                        | 0.42 | 8E-01 |
| Hair Color                   | 0.04                                             | 0.04 | 3E-01 |                                                |      |       | 0.04                                   | 0.04 | 3E-01 |                                             |      |       |
| Polygenic score <sup>1</sup> |                                                  |      |       | 0.03                                           | 0.03 | 4E-01 |                                        |      |       | 0.03                                        | 0.03 | 4E-01 |
| Sex, female                  | -0.30                                            | 0.07 | 1E-05 | -0.29                                          | 0.07 | 2E-05 | -0.31                                  | 0.07 | 9E-06 | -0.30                                       | 0.07 | 1E-05 |
| Age, months                  | 0.00                                             | 0.01 | 9E-01 | 0.00                                           | 0.01 | 9E-01 | 0.00                                   | 0.01 | 1E+00 | 0.00                                        | 0.01 | 1E+00 |
| CS use                       | -0.03                                            | 0.12 | 8E-01 | -0.03                                          | 0.12 | 8E-01 | -0.03                                  | 0.12 | 8E-01 | -0.02                                       | 0.12 | 8E-01 |
| PCA1                         |                                                  |      |       |                                                |      |       | 0.01                                   | 0.03 | 8E-01 | 0.01                                        | 0.03 | 8E-01 |
| PCA2                         |                                                  |      |       |                                                |      |       | 0.04                                   | 0.05 | 4E-01 | 0.04                                        | 0.05 | 5E-01 |
| PCA3                         |                                                  |      |       |                                                |      |       | -0.02                                  | 0.03 | 7E-01 | -0.02                                       | 0.03 | 6E-01 |
| PCA4                         |                                                  |      |       |                                                |      |       | 0.02                                   | 0.03 | 5E-01 | 0.02                                        | 0.03 | 5E-01 |
| PCA5                         |                                                  |      |       |                                                |      |       | 0.00                                   | 0.03 | 1E+00 | 0.00                                        | 0.03 | 9E-01 |
| PCA6                         |                                                  |      |       |                                                |      |       | -0.01                                  | 0.03 | 8E-01 | -0.01                                       | 0.03 | 8E-01 |
| PCA7                         |                                                  |      |       |                                                |      |       | 0.00                                   | 0.04 | 9E-01 | 0.00                                        | 0.04 | 9E-01 |
| PCA8                         |                                                  |      |       |                                                |      |       | -0.04                                  | 0.04 | 2E-01 | -0.04                                       | 0.04 | 2E-01 |
| PCA9                         |                                                  |      |       |                                                |      |       | -0.05                                  | 0.03 | 1E-01 | -0.05                                       | 0.03 | 1E-01 |
| PCA10                        |                                                  |      |       |                                                |      |       | -0.04                                  | 0.03 | 2E-01 | -0.04                                       | 0.03 | 2E-01 |
| PCA11                        |                                                  |      |       |                                                |      |       | 0.01                                   | 0.04 | 9E-01 | 0.00                                        | 0.04 | 1E+00 |
| PCA12                        |                                                  |      |       |                                                |      |       | 0.01                                   | 0.03 | 7E-01 | 0.01                                        | 0.03 | 7E-01 |
| PCA13                        |                                                  |      |       |                                                |      |       | 0.03                                   | 0.03 | 4E-01 | 0.03                                        | 0.03 | 4E-01 |
| PCA14                        |                                                  |      |       |                                                |      |       | -0.03                                  | 0.03 | 3E-01 | -0.03                                       | 0.03 | 3E-01 |
| PCA15                        |                                                  |      |       |                                                |      |       | -0.01                                  | 0.03 | 8E-01 | -0.01                                       | 0.03 | 8E-01 |
| PCA16                        |                                                  |      |       |                                                |      |       | -0.02                                  | 0.03 | 6E-01 | -0.02                                       | 0.03 | 6E-01 |
| PCA17                        |                                                  |      |       |                                                |      |       | 0.00                                   | 0.03 | 9E-01 | 0.00                                        | 0.03 | 9E-01 |
| PCA18                        |                                                  |      |       |                                                |      |       | 0.05                                   | 0.03 | 1E-01 | 0.05                                        | 0.03 | 1E-01 |
| PCA19                        |                                                  |      |       |                                                |      |       | 0.02                                   | 0.03 | 6E-01 | 0.02                                        | 0.03 | 6E-01 |
| PCA20                        |                                                  |      |       |                                                |      |       | -0.01                                  | 0.03 | 8E-01 | -0.01                                       | 0.03 | 8E-01 |

Positive coefficients indicate increases in hormone concentrations. Higher hair color and polygenic scores indicate darker hair. All models were adjusted for sex, age (in months) and corticosteroid (CS) use. Results are shown for models without and with ancestry correction (PCA).

<sup>1</sup>Polygenic score is based on 9 SNPs from a training model adjusted for genetic ancestry



Table S8: Hair cortisone regressed on individual pigmentation SNPs in European ancestry sample (n=862).

| Predictor  | Seperate models<br>(no ancestry<br>correction) |      |       | Mutually Adjusted<br>(no ancestry<br>correction) |      |       | Seperate models<br>(ancestry<br>correction) |      |       | Mutually Adjusted<br>(ancestry<br>correction) |      |       |
|------------|------------------------------------------------|------|-------|--------------------------------------------------|------|-------|---------------------------------------------|------|-------|-----------------------------------------------|------|-------|
|            | $\beta$                                        | SE   | p     | $\beta$                                          | SE   | p     | $\beta$                                     | SE   | p     | $\beta$                                       | SE   | p     |
| rs885479   | -0.06                                          | 0.10 | 6E-01 | -0.07                                            | 0.11 | 5E-01 | -0.05                                       | 0.11 | 6E-01 | -0.07                                         | 0.11 | 6E-01 |
| rs1805008  | 0.20                                           | 0.09 | 2E-02 | 0.20                                             | 0.09 | 4E-02 | 0.21                                        | 0.09 | 2E-02 | 0.21                                          | 0.1  | 3E-02 |
| rs1805005  | -0.09                                          | 0.11 | 4E-01 | -0.07                                            | 0.12 | 6E-01 | -0.10                                       | 0.11 | 4E-01 | -0.07                                         | 0.12 | 5E-01 |
| rs1805007  | -0.02                                          | 0.10 | 8E-01 | 0.00                                             | 0.11 | 1E+00 | -0.01                                       | 0.1  | 9E-01 | 0.02                                          | 0.11 | 8E-01 |
| rs2228479  | 0.05                                           | 0.09 | 6E-01 | 0.05                                             | 0.09 | 6E-01 | 0.06                                        | 0.09 | 5E-01 | 0.06                                          | 0.1  | 5E-01 |
| rs28777    | 0.01                                           | 0.16 | 9E-01 | 0.81                                             | 0.52 | 1E-01 | -0.02                                       | 0.16 | 9E-01 | 0.75                                          | 0.53 | 2E-01 |
| rs16891982 | 0.06                                           | 0.14 | 7E-01 | 0.76                                             | 0.47 | 1E-01 | 0.08                                        | 0.15 | 6E-01 | 0.73                                          | 0.48 | 1E-01 |
| rs2402130  | -0.03                                          | 0.06 | 7E-01 | -0.05                                            | 0.07 | 5E-01 | -0.03                                       | 0.06 | 6E-01 | -0.06                                         | 0.07 | 4E-01 |
| rs12896399 | 0.00                                           | 0.05 | 9E-01 | -0.02                                            | 0.05 | 8E-01 | -0.01                                       | 0.05 | 8E-01 | -0.03                                         | 0.06 | 6E-01 |
| rs1042602  | -0.02                                          | 0.05 | 8E-01 | 0.02                                             | 0.06 | 7E-01 | -0.03                                       | 0.05 | 6E-01 | 0.01                                          | 0.06 | 8E-01 |
| rs1393350  | 0.12                                           | 0.06 | 4E-02 | 0.13                                             | 0.06 | 3E-02 | 0.13                                        | 0.06 | 3E-02 | 0.14                                          | 0.06 | 2E-02 |
| rs12821256 | -0.03                                          | 0.07 | 7E-01 | -0.04                                            | 0.07 | 6E-01 | -0.02                                       | 0.07 | 8E-01 | -0.03                                         | 0.07 | 7E-01 |
| rs4959270  | 0.01                                           | 0.05 | 9E-01 | 0.00                                             | 0.05 | 9E-01 | 0.00                                        | 0.05 | 1E+00 | 0.00                                          | 0.05 | 1E+00 |
| rs12203592 | -0.01                                          | 0.08 | 9E-01 | -0.01                                            | 0.09 | 9E-01 | 0.00                                        | 0.09 | 1E+00 | 0.00                                          | 0.09 | 1E+00 |
| rs1800407  | 0.02                                           | 0.17 | 9E-01 | 0.00                                             | 0.17 | 1E+00 | 0.01                                        | 0.17 | 9E-01 | 0.00                                          | 0.17 | 1E+00 |
| rs2378249  | 0.11                                           | 0.06 | 7E-02 | 0.12                                             | 0.06 | 5E-02 | 0.11                                        | 0.06 | 8E-02 | 0.12                                          | 0.06 | 6E-02 |
| rs683      | 0.02                                           | 0.05 | 6E-01 | 0.02                                             | 0.05 | 7E-01 | 0.02                                        | 0.05 | 7E-01 | 0.02                                          | 0.05 | 7E-01 |

SNPs were either included in seperate models or mutually adjusted in a single model. Positive coefficients indicate increases in hormone concentrations per effect allele (see Table S1).

Table S9: Hair cortisol and cortisone regressed on polygenic score of hair color stratified by national origin of ethnic minorities

| National Origin  | n   | $\beta$ | SE   | p     |
|------------------|-----|---------|------|-------|
| <i>Cortisol</i>  |     |         |      |       |
| Africa           | 193 | 0.22    | 0.09 | 1E-02 |
| Asia             | 46  | 0.29    | 0.27 | 3E-01 |
| Caribbean        | 156 | 0.08    | 0.11 | 5E-01 |
| Turkey           | 147 | 0.17    | 0.10 | 8E-02 |
| <i>Cortisone</i> |     |         |      |       |
| Africa           | 185 | 0.15    | 0.09 | 8E-02 |
| Asia             | 43  | 0.34    | 0.22 | 1E-01 |
| Caribbean        | 153 | 0.24    | 0.15 | 1E-01 |
| Turkey           | 141 | 0.09    | 0.11 | 4E-01 |

Positive coefficients indicate increases in hormone concentrations. Higher polygenic scores indicate darker hair. All models were adjusted for sex, age (in months), corticosteroid use and genetic ancestry.

# Correlations between PCA, SNPs and Genetic Score

Figure S10: Pearson correlations between PCA, SNPs and genetic score

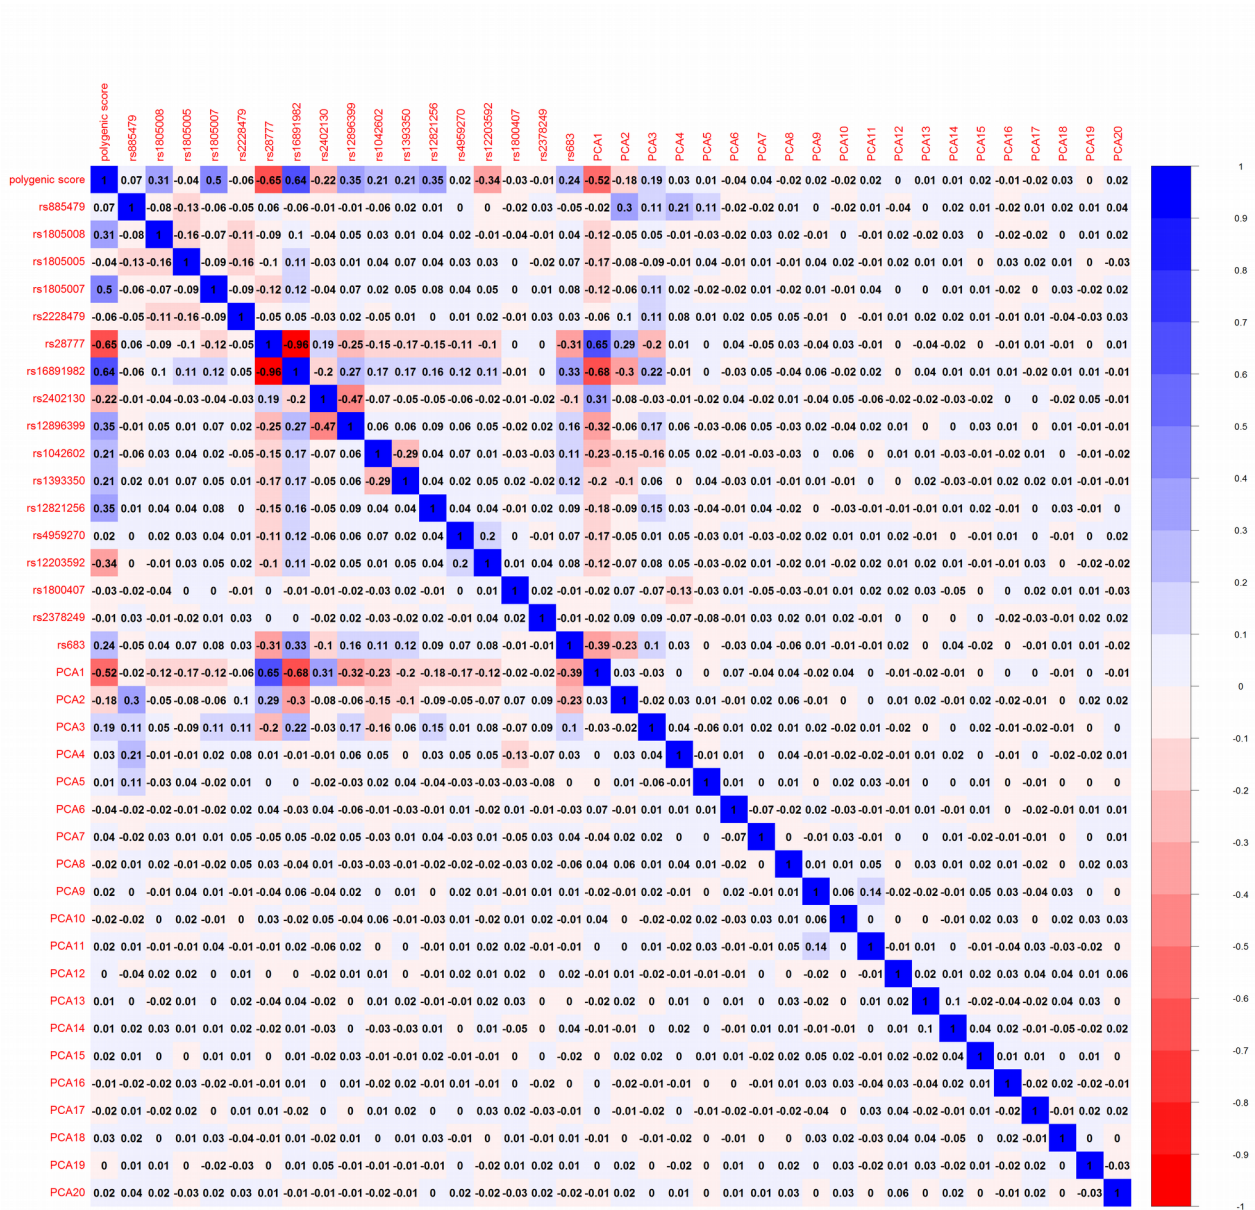

## Funnel plot of single SNP associations with hair cortisol

Figure S11: Funnel plot showing standardized estimates of 9 SNPs associated with hair cortisol against their standard error. White area indicates 95% confidence interval. SNPs not included in polygenic score were omitted. Each model was adjusted for sex, age (in months), corticosteroid (CS) use and genetic ancestry (PCA).

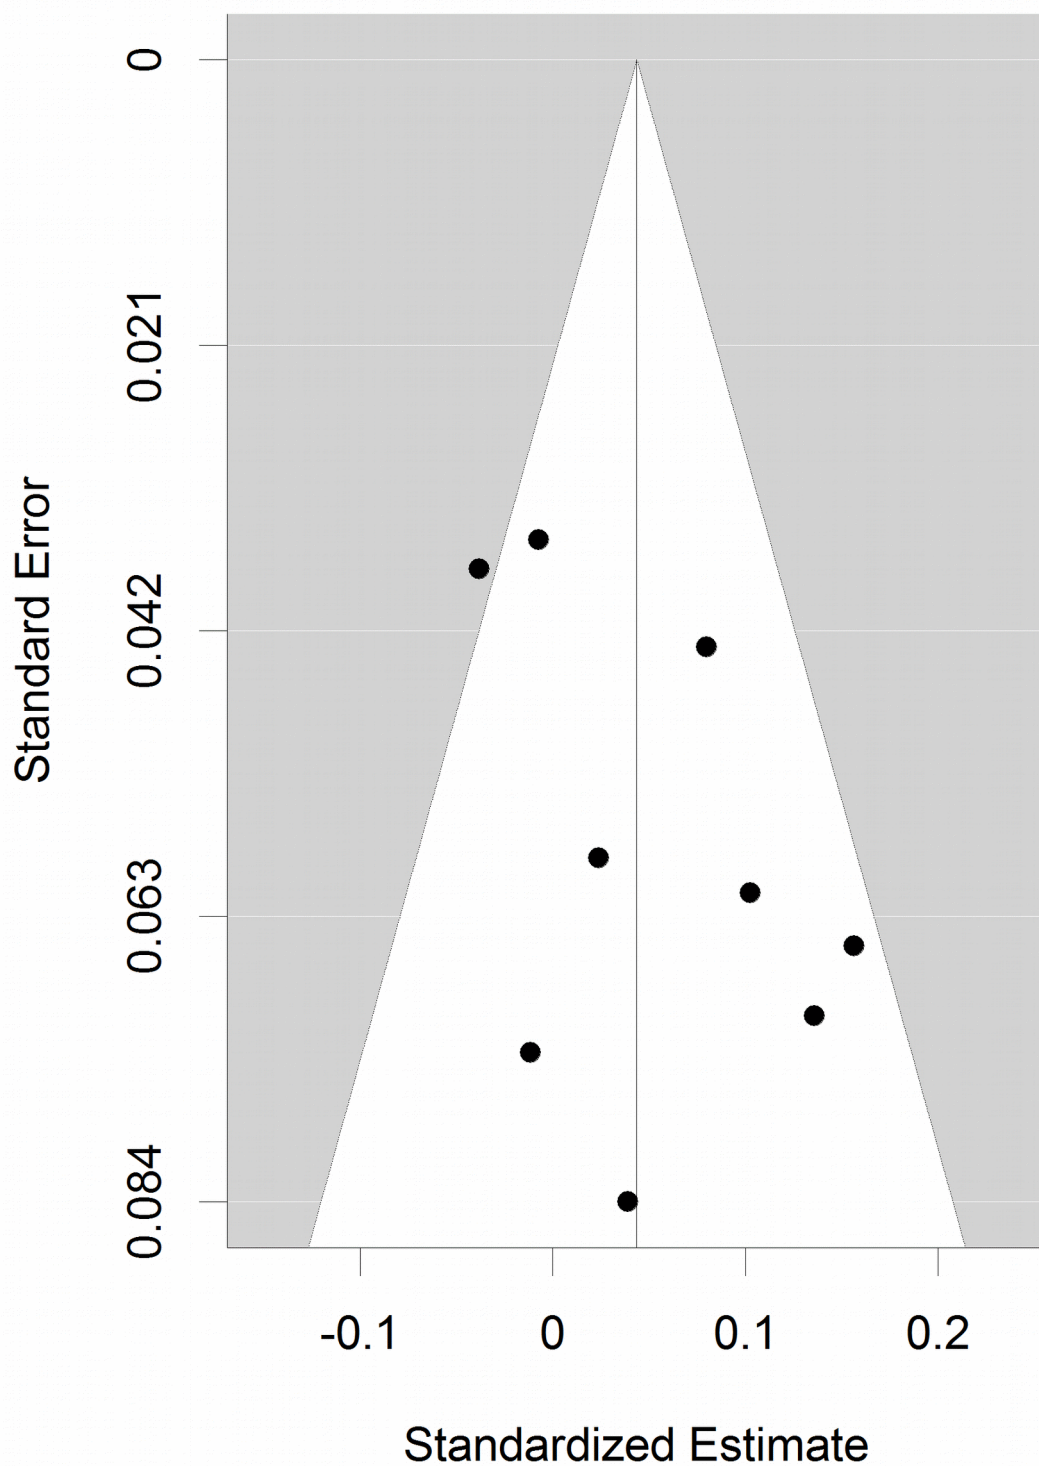

Supplement: 41598_2017_7034_MOESM1_ESM.pdf [file 41598_2017_7034_MOESM1_ESM.pdf]
